# Supplementary material for: Relationship between Chemical Composition and Oxidative Potential of Secondary Organic Aerosol from Polycyclic Aromatic Hydrocarbons
Source: Copernicus journal article supplement (doi:10.5194/acp-2017-1012), 2017-11-10
Supplement: Supplementary file [file acp-2017-1012-AC2-supplement.pdf]

1 **Response to comments from referee #2**

2 We appreciate the valuable and thoughtful comments provided by the referee.

3 Our response and corresponding modifications are listed below.

4

5 **General comments:**

6 The authors of current manuscript investigated the correlation of chemical composition of  
7 laboratory generated naphthalene and phenanthrene SOA (NSOA and PSOA) with their  
8 oxidative potentials (OP) using dithiothreitol (DTT) assay in combination with LC-MS and  
9 NMR techniques. They found the oligomer-rich fractions but not the peroxides dominate the OP  
10 activity of NSOA and PSOA. Furthermore, they found the ozonolysis of NSOA particles can  
11 elevate their OP prominently. Later on, they found the DTT activities of the mixtures of copper  
12 ions with redox-active organics or SOA are not additive. Based on NMR measurement, the  
13 authors assigned this phenomenon to the formation of complexes. Overall the presented  
14 results are interesting and the scientific is sound. The manuscript was written well. Therefore  
15 I would like to recommend this manuscript to be published in Atmos. Chem. Phys. if my  
16 following concerns can be fully addressed.

17

18 **Specific comments:**

19 **1.** In Figure 1, the authors illustrated that both of hydroquinone and semiquinone can reduce  
20  $O_2$  to  $O_2 \cdot^-$ . However, Dellinger et al. (Chem. Res. Toxicol., 14, 1371-1377, 2001.) suggested

21 that semiquinone is responsible for reducing  $O_2$  to  $O_2 \cdot^-$ , but hydroquinone is responsible  
22 for transforming  $O_2 \cdot^-$  to  $H_2O_2$ . Is there any conflict of Figure 1 with literature?

23 **Response:** Thank you very much for this comment. Redox-active quinones act as electron  
24 transfer agent that can constantly transfer electrons from reductants to oxidants (e.g. from  
25 NADPH to  $O_2$ ). The redox-chemistry for quinones inside human body is relative complicated  
26 through both enzymatic and nonenzymatic redox cyclings accompanied by the generation of  
27 ROS while Fig.1 presented in our manuscript is highly simplified. Base on the previous studies,  
28 quinones at a reduced state (semiquinone and hydroquinone) are able to be oxidized by  
29 monooxygenase or peroxidase enzymes, molecular oxygen (autoxidation) and metal ions  
30 (Roginsky et al., 1999;Monks et al., 1992;Bolton et al., 2000). Transferring electrons from  $O_2 \cdot^-$  to  
31  $H_2O_2$  has been proved to be an alternative pathway for hydroquinone to evolve into  
32 semiquinone/quinone.

33

34 **2.** In lines of 161 to 163, the authors said “Within 3 days of collection, the filters were  
35 extracted in methanol (HPLC grade, 99.9%, Sigma Aldrich, St. Louis, MO, USA), by  
36 ultrasonication at room temperature for more than 3 minutes.” Respect to this experiment  
37 procedure, I have two questions. Firstly, Krapf et al. (Chem, 1, 603-616, 2016.)  
38 demonstrated that ‘OOH-containing molecules are labile and decay with a half-life of only  
39  $45 \pm 3$  min’. So the aging of SOA in freezer for 3 days may significantly decrease the final  
40 OP of them? Secondly, the authors extracted SOA into methanol and then measured their  
41 OP with DTT assay. Considering organic solvent has different effect from water to  
42 influence the OP of ambient particulate matters (Yang et al., Atmos. Environ. 2014), I am

43 wondering how significant the methanol and ultra-sonication operation will influence the  
44 OP of SOA here.

45

46 **Response:** Krapf et al. (2016) showed OOH-containing molecules are labile and decay with a  
47 half-life of only  $45 \pm 3$  min. This SOA peroxide thermal-decomposition fate was investigated  
48 under room temperature. In this work, the SOA samples were stored under  $-20$  °C after being  
49 collected and wrapped in prebaked aluminum foil. In the study of Jiang et al. (2017), they have  
50 tested the DTT response against the stability of peroxide. They stored organic peroxide and  
51 hydrogen peroxide under room temperature and  $4$  °C. The DTT responses were maintained  
52 above 90% within 3 days under both temperatures. Moreover, peroxide stored under  $4$  °C  
53 exhibited a higher DTT response than that of room temperature, indicating lower storage  
54 temperature could prevent the thermal decomposition of organic peroxide. Admittedly, the  
55 peroxide content in SOA is labile, but the stability of SOA peroxide under the storage condition  
56 of our study ( $-20$  °C) seems unlikely to make a significant difference in the DTT results.

57 Based on previous studies (McWhinney et al., 2011), quinones are the major OP contributors in  
58 PAH derived SOA and their solubility in methanol are generally higher than in MQ water. Also  
59 Yang et al. (2014) suggested that quartz filter absorbs water during extraction which might bring  
60 about the loss of SOA. As a result, we consider using methanol as our SOA extraction solvent  
61 and then reconstitute with phosphate buffer for DTT analysis. The effects on SOA composition  
62 coming from ultra-sonication has been discussed by Mutzel et al. (2013), which found ultra-  
63 sonication might elevate the peroxide content (thermal-lability) inside SOA. Despite the higher

64 measured peroxide content, there is no associated change in the OP of SOA. We therefore  
65 conclude that we find no evidence of association between peroxide content and OP in NSOA.

66

67 **3.** In line 171: the author said "...DTT, an antioxidant that...". This is a wrong description. DTT  
68 is normally used as a surrogate of biological reductant (NADPH etc.), but itself is not antioxidant  
69 (Charrier and Anastasio. *Atmos. Chem. Phys.*, 12, 9321-9333, 2012. Shiraiwa et al., *Environ. Sci.*  
70 *Technol.*, 2017, 51 (23), pp 13545-13567.).

71 **Response:** This sentence has been revised as ".....DTT, an antioxidant surrogate that....." in  
72 line 171.

73

74 **4.** In line 173-174, the authors said "The SOA extracts were first evaporated to complete  
75 dryness in a 5.0 L min<sup>-1</sup> of N<sub>2</sub> using a blow off system (N-EVAP, Organomation, USA)." Then  
76 in lines of 468-470, the authors indicated that "The overall increased volatility may lead  
77 to evaporation of smaller redox-active molecules and decrease the DTT<sub>t</sub> compared to the  
78 N<sub>2</sub> exposure group." So whether the loss of small molecular redox active compounds have  
79 also happened during the evaporation of SOA, and how significant this process will  
80 influence the DTT of SOA especially the monomer rich fraction?

81 **Response:** Thank you for pointing this out. The N<sub>2</sub> blow-off procedure is for SOA methanol  
82 extracts while the later conclusion of "carbon loss due to volatility" was based on the EC/OC

83 results after heterogeneous ozonolysis of SOA filter. The duration for heterogeneous oxidation  
84 ranges from 1 hour to 24 hours in our study while the N<sub>2</sub> blow off procedure for SOA methanol  
85 extracts only lasts for 30-40 minutes. Also the evaporation rate may be lower in a dilute  
86 methanol solution. However, there may still be potential volatile losses of low molecular weight  
87 high volatility SOA compounds during the N<sub>2</sub> blow off procedure. To assess the potential  
88 impacts on the DTT activity, we evaporated SOA methanol extracts under the N<sub>2</sub> blow-off

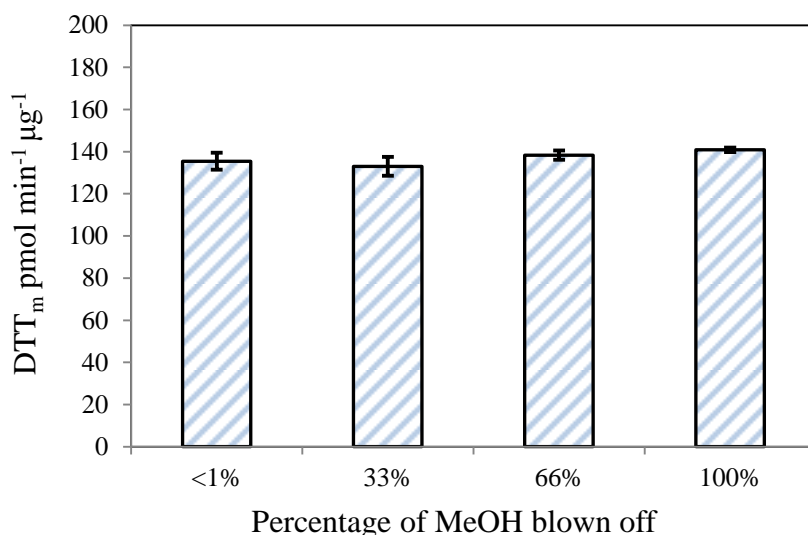

89 system to various extents, with which 100%, 66%, 33%, <1% of methanol were remained. All  
90 the solutions were then reconstituted the same experimental concentration by adding methanol  
91 and phosphate buffer. There was no significant difference among each experimental group. Thus,  
92 we conclude the evaporation of high volatile SOA compounds during N<sub>2</sub> blow-off procedure is  
93 not likely to cause a significant underestimation of the OP studied here.

94

95 **5.** In Fig 5 c and d, the sub-caption is “contribution to NSOA DTT activity”, but the pie charts  
96 actually showed the relative total DTT decay rate (DTT<sub>t</sub>) of different N/PSOA fractions. The

97 misleading word “contribution” here is different from the one used in line 336 of the  
98 manuscript, which is based on 1, 2- and 1, 4-naphthoquinone particulate concentrations  
99 exactly (McWhinney et al. 2013, which is  $DTT_m$ ). Considering the current study cannot  
100 quantify the recovery of monomer-rich and oligomer-rich compounds from N/PSOA (as  
101 stated by the authors in lines 410 to 412), the authors should not be able to use mass  
102 normalized DTT value to predict the contribution of monomer-rich and oligomer-rich  
103 fractions to  $DTT_m$  of N/PSOA. The caption and relevant illustration for Figure 5 c and d  
104 should be improved and clarified clearly, especially to compare with the work by  
105 McWhinney et al.

106 **Response:** We apologize for not clarifying this.

107 Line 10 in Abstract has been modified as “...dominates DTT activity in both SOA systems...”  
108 Text in section 3.3 has been revised to “... in Fig. 5, both the monomer-rich and oligomer-rich  
109 fractions are reactive towards DTT. Compared to the  $DTT_t$  of NSOA before LC separation, the  
110 relative  $DTT_t$  of monomer-rich fraction and oligomer-rich fraction were  $16 \pm 3\%$  and  $56 \pm 10\%$ ,  
111 respectively (Fig. 5c). For PSOA, relative  $DTT_t$  from monomer-rich fraction and oligomer-rich  
112 fraction were  $40 \pm 8\%$  and  $50 \pm 5\%$ , respectively (Fig. 5d).”

113 The sub-caption for Fig. 5c and d has been revised to “Relative  $DTT_t$  from monomer-rich  
114 fraction and oligomer-rich fraction in NSOA (c) and PSOA (d) systems.”

115

116 **6.** Respect to the results discussed in section 3.5 especially that showed in the Figure 8,  
117 whether the Cu initiated Fenton like reactions or relevant redox chemistry also play  
118 significant role? The authors are encouraged to discuss this aspect in the manuscript

119 **Response:** Thanks for this suggestion. First, we observed that the OP reduction of quinones in  
120 our study has a structural dependence. It was with 1,2-NQN and 2,3-DHN that we witnessed a  
121 significant OP depletion but not with 1,4-NQN and 1,3-DHN. Similar OP depletion trend should  
122 be observed with the four quinones after Cu was added to the system if Cu initiated Fenton like  
123 reactions or other relevant redox chemistry also played significant roles in the OP depletion.

124 While the Fenton reaction is faster under acidic conditions (Zepp et al., 1992; Kang and Hwang,  
125 2000), we would expect the additional OH<sup>·</sup> or HOO<sup>·</sup> produced through the Fenton reaction  
126 under controlled pH conditions to elevate the OP level while this is inconsistent with what we  
127 observed with 1,2-NQN, 2,3-DHN and PAH derived SOA. Combining the NMR organic  
128 molecular structural information, we propose that the OP depletion in our study is more likely  
129 due to the binding between organics and Cu.

130

131 **7.** It will be useful to add the averaged carbon oxidation state values of monomer and  
132 oligomer rich fractions of N/PSOA into Figure 6.

133 **Response:** Thanks for this advice. Since most of the m/z peaks in ESI-MS spectra (negative  
134 mode) are polar compounds due to the electron spray ionization. The ESI-MS signal weighed  
135  $\overline{OSc}$  of both monomer and oligomer would not be comprehensive and representative enough for  
136 the total SOA system we studied here. Also, the calculation of  $\overline{OSc}$  relies on the molecular

137 formula of each compound while the accuracy of peak fitting for higher m/z range (oligomer)  
138 might be lower than that of the lower m/z range (monomer). So far, we are currently unable to  
139 add accurate  $\overline{OSc}$  values for monomer and oligomer rich fractions of N/PSOA.

140

141 **8.** The section of 'References' should be improved carefully, e.g. the references of Mentel et  
142 al., 2015 (in line 347) and Tong et al., 2016 (in line 383) could not be find in reference list.

143 In addition, in line 740: '2009' should be '2010'. In line 680, the reference of 'Di Lorenzo  
144 et al., Geophys. Res. Lett., 43, 458-465, 2016' should be separated with the previous one.

145 **Response:** References of this manuscript has been checked and corrected.

146

147 **9.** Typos should be corrected for the whole manuscript, e.g. blank space should be used  
148 between number and unit: '160W' should be '160 W'

149 **Response:** Typos of this manuscript has been checked and corrected.

150

151

152

153

154



155 **References**

- 156 Bolton, J. L., Trush, M. A., Penning, T. M., Dryhurst, G., and Monks, T. J.: Role of quinones in  
157 toxicology, *Chem. Res. Toxicol.*, 13, 135-160, 2000.
- 158 Jiang, H., Jang, M., and Yu, Z.: Dithiothreitol activity by particulate oxidizers of SOA produced  
159 from photooxidation of hydrocarbons under varied NO<sub>x</sub> levels, *Atmos. Chem. Phys.*, 17, 9965-  
160 9977, 2017.
- 161 Kang, Y. W., and Hwang, K. Y.: Effects of reaction conditions on the oxidation efficiency in the  
162 Fenton process, *Water Res.*, 34, 2786-2790, 2000.
- 163 Krapf, M., El Haddad, I., Bruns, Emily A., Molteni, U., Daellenbach, Kaspar R., Prévôt, André S.  
164 H., Baltensperger, U., and Dommen, J.: Labile Peroxides in Secondary Organic Aerosol, *Chem*,  
165 1, 603-616, <http://dx.doi.org/10.1016/j.chempr.2016.09.007>, 2016.
- 166 McWhinney, R. D., Gao, S. S., Zhou, S., and Abbatt, J. P. D.: Evaluation of the effects of ozone  
167 oxidation on redox-cycling activity of two-stroke engine exhaust particles, *Environ. Sci.*  
168 *Technol.*, 45, 2131-2136, 2011.
- 169 Monks, T. J., Hanzlik, R. P., Cohen, G. M., Ross, D., and Graham, D. G.: Quinone chemistry  
170 and toxicity, *Toxicol. Appl. Pharm.*, 112, 2-16, 1992.
- 171 Mutzel, A., Rodigast, M., Iinuma, Y., Böge, O., and Herrmann, H.: An improved method for the  
172 quantification of SOA bound peroxides, *Atmos. Environ.*, 67, 365-369, 2013.
- 173 Roginsky, V. A., Pisarenko, L. M., Bors, W., and Michel, C.: The kinetics and thermodynamics  
174 of quinone–semiquinone–hydroquinone systems under physiological conditions, *J. Chem. Soc.*,  
175 *Perkin Transactions 2*, 871-876, 1999.

176 Yang, A., Jedynska, A., Hellack, B., Kooter, I., Hoek, G., Brunekreef, B., Kuhlbusch, T. A.,  
177 Cassee, F. R., and Janssen, N. A.: Measurement of the oxidative potential of PM<sub>2.5</sub> and its  
178 constituents: the effect of extraction solvent and filter type, *Atmos. Environ.*, 83, 35-42, 2014.  
179 Zepp, R. G., Faust, B. C., and Hoigne, J.: Hydroxyl radical formation in aqueous reactions (pH  
180 3-8) of iron (II) with hydrogen peroxide: the photo-Fenton reaction, *Environ. Sci. Technol.*, 26,  
181 313-319, 1992.

182

183
